1 **Morphine selectively promotes glutamate release from glutamatergic terminals**  
2 **of projection neurons from medial prefrontal cortex to dopamine neurons of**  
3 **ventral tegmental area**

4

5 Li Yang, Ming Chen, Ping Zheng

6 State Key Laboratory of Medical Neurobiology, Collaborative Innovation Center for  
7 Brain Science, School of Basic Medical Sciences and Institutes of Brain Science,  
8 Fudan University, Shanghai, China

9

10 **Corresponding author:**

11 Ping Zheng, PhD

12 State Key Laboratory of Medical Neurobiology, Shanghai Medical College, Fudan  
13 University, 138 Yixueyuan Road, Shanghai 200032, People's Republic of China.

14 Phone: (86)(21) 54237437

15 Fax: (86)(21) 64174579

16 E-mail: [pzheng@shmu.edu.cn](mailto:pzheng@shmu.edu.cn)

17

18 **Manuscript Information:**

19 1. The number of words in the abstract: 149

20 2. The number of words in the main text: 1708

21 3. The number of figure (s): 4

22

23 **Abstract**

24 Recently, we found that morphine promoted presynaptic glutamate release of  
25 dopamine (DA) neurons in the ventral tegmental area (VTA), which constituted the  
26 main mechanism for morphine-induced increase in VTA-DA neuron firing and related  
27 behaviors (Chen et al., 2015). However, what source of presynaptic glutamate release  
28 of DA neurons in the VTA is promoted by morphine remains unknown. To address this  
29 question, we used optogenetic strategy to selectively activate glutamatergic inputs  
30 from different projection neurons and then observed the effect of morphine on them.  
31 The result shows that morphine promotes glutamate release from glutamatergic  
32 terminals of projection neurons from the medial prefrontal cortex (mPFC) to VTA DA  
33 neurons, but has no effect on that from the basolateral amygdala (BLA) or the lateral  
34 hypothalamus (LH) to VTA DA neurons, and the inhibition of glutamatergic projection  
35 neurons from the mPFC to the VTA significantly reduces morphine-induced increase  
36 in locomotor activity of mice.

37

38 **Key words:**

39 morphine; dopamine neurons; ventral tegmental area; optogenetic method; glutamate  
40 release; medial prefrontal cortex; basolateral amygdala; lateral hypothalamus

41

## 42 **Introduction**

43 Morphine-induced addictive behaviors are strongly dependent on the activation of  
44 dopamine (DA) neurons of the ventral tegmental area (VTA) (Wise, 1989, Gardner,  
45 2011, Luscher and Malenka, 2011). One previously reported mechanism for morphine  
46 to activate VTA-DA neurons is the disinhibition model of VTA-DA neurons (Johnson  
47 and North, 1992, Kalivas, 1993, White, 1996). Recently, we found that morphine could  
48 promote presynaptic glutamate release of VTA-DA neurons, which constituted the  
49 main mechanism for morphine-induced increase in VTA-DA neurons firing and related  
50 behaviors (Chen et al., 2015). However, what source of presynaptic glutamate release  
51 of DA neurons in the VTA is promoted by morphine remains unknown.

52 It has been known that DA neurons of the VTA receive glutamatergic inputs from  
53 the medial prefrontal cortex (mPFC), the bilateral amygdala (BLA) and the lateral  
54 hypothalamus (LH) (Stuber et al., 2012, Li et al., 2013). To study which glutamatergic  
55 inputs onto DA neurons of the VTA are modulated by morphine, we used optogenetic  
56 strategy to selectively activate glutamatergic inputs from these different projection  
57 neurons and then observed the effect of morphine on them. We also studied the  
58 contribution of morphine-induced increase in presynaptic glutamate release of DA  
59 neurons in the VTA from specific brain region to morphine-induced increase in  
60 locomotor activity of mice, which is an index of enhanced DA function in the VTA  
61 (Jalabert et al., 2011).

62

## 63 **Results**

64 **Morphine promotes glutamate release from glutamatergic terminals of**  
65 **projection neurons from the mPFC to VTA DA neurons, but has no effect on that**  
66 **from the BLA or the LH to VTA DA neurons**

67 To study whether morphine promoted glutamate release from glutamatergic terminals  
68 of projection neurons from the mPFC, the BLA or the LH to VTA DA neurons, we used  
69 a pair of optical pulses at intervals of 50 ms at 0.1 Hz to evoke excitatory postsynaptic  
70 currents (EPSC) in VTA DA neurons from these different brain areas and then  
71 observed the effect of morphine on paired-pulse ratio (PPR) of blue light (470  
72 nm)-evoked EPSCs pulses (intervals of 50 ms at 0.1 Hz). PPR, measured as the ratio  
73 of EPSC amplitude in response to two successive stimulation pulses, reflects  
74 presynaptic release probability; a lower PPR correlates with higher release probability  
75 (Zucker and Regehr, 2002, Li et al., 2013). Left panel of **Fig. 1a** showed the  
76 expression of ChR2-mCherry in the mPFC at 6 weeks after the injection of the virus  
77 into the mPFC and right panel of **Fig. 1a** showed the expression of ChR2-mCherry in  
78 the VTA at 6 weeks after the injection of the virus into the mPFC. Left panel of **Fig. 1b**  
79 showed typical original traces of the first and second EPSCs before and after  
80 morphine (10  $\mu$ M) as well as superimposed traces of the first and second EPSCs  
81 normalized to the amplitude of the first EPSC in DA neurons of the VTA. The average  
82 first EPSC was increased by  $50.33 \pm 10.39$  % ( $n = 7$ , from 5 animals), whereas the  
83 average second EPSC was increased by  $8.03 \pm 13.71$  % ( $n = 7$ , from 5 animals) at 15  
84 min after morphine. So the superimposition of the two traces normalized to the first  
85 EPSC showed that PPR significantly decreased after morphine (left panel of **Fig. 1b**).

86 The average PPR decreased from  $1.01 \pm 0.07$  before morphine to  $0.72 \pm 0.1$  at 15  
87 min after morphine (right panel of **Fig. 1b**,  $n = 7$ , from 5 animals, paired t test,  $P =$   
88  $0.0278$ , compared to control before morphine). However, morphine ( $10 \mu\text{M}$ ) had no  
89 significant effect on PPR evoked by optical stimulation of ChR2-mCherry-positive  
90 excitatory terminals from the BLA or the LH to VTA DA neurons. The average PPR  
91 was  $0.77 \pm 0.1$  before morphine and  $0.8 \pm 0.06$  at 15 min after morphine in  
92 BLA-to-VTA group (right panel of **Fig. 2b**,  $n = 11$ , from 8 animals, paired t test,  $P =$   
93  $0.8239$ , compared to control before morphine) and the average PPR was  $0.84 \pm 0.07$   
94 before morphine and  $0.87 \pm 0.08$  at 15 min after morphine in LH-to-VTA group (right  
95 panel of **Fig. 3b**,  $n = 7$ , from 5 animals, paired t test,  $P = 0.8082$ , compared to control  
96 before morphine). These results suggest that morphine can promote glutamate  
97 release from glutamatergic terminals of projection neurons from the mPFC to VTA DA  
98 neurons, but has no effect on that from the BLA or the LH to VTA DA neurons.

99

100 **Inhibition of glutamatergic projection neurons from the mPFC to the VTA**  
101 **significantly reduces morphine-induced increase in locomotor activity of mice**

102 To evaluate the contribution of morphine-induced increase in glutamate release from  
103 mPFC-VTA projection neurons to morphine-induced increase in locomotor activity of  
104 mice, we observed the influence of the inhibition of glutamatergic projection neurons  
105 from the mPFC to the VTA using chemogenetic method (Armbruster et al., 2007) on  
106 morphine-induced increase in locomotor activity of mice. We bilaterally injected a  
107 retrograde canine adenovirus expressing the Cre recombinase (CAV-GFP-Cre) into

108 the VTA (Penzo et al., 2015), followed by the injection of the AAV-DIO-hM4Di-mCherry  
109 into the mPFC. Six weeks after the infection, the expression of  
110 AAV-DIO-hM4D(Gi)-mCherry was observed in the mPFC (left panel of **Fig. 4a**) due to  
111 retrograde transported CAV-GFP-Cre from the VTA (right panel of **Fig. 4a**) to the  
112 mPFC. This intersectional strategy can effectively target glutamatergic projection  
113 neurons from the mPFC to the VTA, which, subsequently, can be suppressed by  
114 treating mice with clozapine-N-oxide (CNO), the agonist of hM4Di. On this basis, we  
115 measured morphine-induced increase in locomotor activity of mice with and without  
116 CNO. The result showed that in control group where mice with hM4D(Gi) were given  
117 saline (i.p), morphine (10 mg/kg) could increase locomotor activity of mice. The  
118 average distance traveled in morphine+hM4D(Gi)+saline group was  $305.4 \pm 66.95$  cm  
119 before and  $4913 \pm 392.6$  cm during 5 min at 15 min after i.p morphine (10 mg/kg,  $n =$   
120 12 mice, two-way ANOVA,  $F_{(1, 21)} = 11.63$ ,  $*P < 0.001$ , compared with control before  
121 morphine, left panel of **Fig. 4b**). However, in the CNO group where mice with  
122 hM4D(Gi) were given CNO (i.p), morphine-induced increase in locomotor activity of  
123 mice significantly decreased. The average distance traveled by mice in  
124 morphine+hM4D(Gi)+CNO group was  $372.6 \pm 51.67$  cm before and  $2973 \pm 356.9$  cm  
125 during 5 min at 15 min after i.p morphine ( $n = 11$  mice, two-way ANOVA,  $F_{(1, 21)} =$   
126  $11.63$ ,  $*P < 0.0001$ , compared with control before morphine;  $F_{(1, 21)} = 14.22$ ,  $\#P =$   
127  $0.0011$ , compared with morphine+hM4D(Gi)+saline group, left panel of **Fig. 4b**). The  
128 average change percentage of distance traveled by mice in  
129 morphine+hM4D(Gi)+CNO was  $964.1 \pm 251.3$  %, which was significantly lower than

130 that ( $2551 \pm 615.9$  %) without CNO (independent t test,  $P = 0.0313$ , compared with  
131 morphine+hM4D(Gi)+saline group, right panel of **Fig. 4b**). This result suggests that  
132 morphine-induced increase in glutamate release from mPFC-VTA projection neurons  
133 contributes to morphine-induced increase in locomotor activity of mice.

134

## 135 **Discussion**

136 It has been known that the activation of DA neurons of the VTA plays an important role  
137 in both natural stimulus and drug-induced reward response. Under natural state  
138 without drugs, direct optogenetic stimulation of VTA DA neurons has been  
139 demonstrated to be sufficient to modulate reward-related behaviors (Stuber et al.,  
140 2012). In further researches that involved how specific glutamatergic afferents  
141 modulate the activity of DA neurons in the VTA, it was found that the LH sent the  
142 largest subcortical glutamatergic projection to the VTA (Stuber et al., 2012) and  
143 electrical stimulation of the LH predominately increases the firing rates of VTA  
144 neurons (Stuber et al., 2012). This evidence suggests that LH-VTA glutamatergic  
145 projection neurons may be an important circuit in natural stimulus-induced reward.  
146 Another major source of glutamatergic input to the VTA comes from a long-range  
147 projection from the mPFC, which can target DA neurons of the VTA (Stuber et al.,  
148 2012). Stimulation of the mPFC led to the increase in extracellular glutamate in the  
149 VTA (Stuber et al., 2012), the activation of DA neurons of the VTA (Stuber et al., 2012)  
150 and the elevation of DA release in the forebrain (Stuber et al., 2012). These evidences  
151 suggest that glutamatergic projection neurons from the mPFC to VTA DA neurons

152 may be another important circuit in natural stimulus-induced reward. In addition, DA  
153 neurons of the VTA also receive glutamatergic projections from the BLA (Stuber et al.,  
154 2012). However, for the drug-induced reward response, it is still unknown that  
155 morphine acts at what glutamatergic pathways to activate DA neurons in the VTA.  
156 Here, we find that morphine selectively promotes glutamate release from  
157 glutamatergic terminals of projection neurons from the mPFC to the VTA, but has no  
158 effect on that from the BLA or the LH to the VTA. This result suggests that morphine  
159 may mainly acts at glutamatergic terminals of projection neurons from the mPFC to  
160 the VTA to activate DA neurons of the VTA. This result is consistent with the report  
161 that the microinjection of morphine into the mPFC cannot produce rewarding effects  
162 (Liu et al., 2015) because the site of action of morphine on mPFC-VTA glutamatergic  
163 projection neurons is at terminals, rather than at the cell body in the mPFC.

164 What needs to be explained is that in our previous study in the VTA (Chen et al.,  
165 2015), when we use a pair of electrical pulses at intervals of 50 ms at 0.1 Hz to evoke  
166 EPSC, it always produces paired pulse facilitation, but here when we use a pair of  
167 optical pulses at intervals of 50 ms at 0.1 Hz to evoke EPSC in the VTA, it always  
168 produces paired pulse depression. This phenomenon also existed in the study by  
169 Vincent Pascoli et al (Pascoli et al., 2011). The reason for this difference remains  
170 unknown.

171 We further evaluate the contribution of morphine-induced increase in glutamate  
172 release of mPFC-VTA projection neurons to morphine-induced increase in locomotor  
173 activity of mice, which is an index of enhanced DA function in the VTA (Jalabert et al.,



174 2011). The result shows that the inhibition of glutamatergic projection neurons from  
175 the mPFC to the VTA significantly reduces morphine-induced increase in locomotor  
176 activity of mice. This result was consistent with the report that the inactivation of the  
177 mPFC by the intra-mPFC injection of TTX could eliminate the acute  
178 morphine-induced excitation of DA neurons in the VTA (Liu et al., 2015).

179

## 180 **Materials and methods**

### 181 **Virus injection**

182 Bilateral injections of purified and concentrated pAAV-CaMKII-hChR2  
183 (H134R)-mCherry, CAV-GFP-cre and AAV-hSyn-DIO-hM4D(Gi)-mCherry virus  
184 ( $2.05 \times 10^{12}$  vector genomes/ml, Neuron Biotech Company, China) were stereotaxically  
185 performed in 6-week-old male C57/BL6 mice. Each side of the mPFC (final  
186 coordinates: AP, 1.95 mm; ML,  $\pm$  0.33 mm; DV, - 2.4 mm from the skull surface), the  
187 BLA (final coordinates: AP, - 1.4mm; ML,  $\pm$  3.0 mm; DV, - 4.8 mm from skull surface)  
188 and the LH (final coordinates: AP, - 2.8 mm; ML,  $\pm$  0.4 mm; DV, - 4.2 mm from the  
189 skull surface) were respectively injected with 0.5  $\mu$ l hChR2 (H134R)-mCherry. Each  
190 side of the mPFC (final coordinates: AP, 1.95 mm; ML,  $\pm$  0.33 mm; DV, - 2.4 mm from  
191 the skull surface) was injected with 0.5  $\mu$ l DIO-hM4D(Gi)-mCherry and each side of  
192 the VTA (final coordinates: AP, - 3.08 mm; ML,  $\pm$  0.35 mm; DV, - 4.8 mm from skull  
193 surface) was injected with 0.5  $\mu$ l CAV-GFP-cre in the same manner (Chen et al.,  
194 2015). After the injection of virus, the animals were housed individually and were  
195 allowed to recover for over one week.

196

### 197 **VTA slice preparation**

198 Male mice were anesthetized with chloral hydrate (400 mg/kg, i.p.). All experimental  
199 procedures conformed to Fudan University as well as international guidelines on the  
200 ethical use of animals. All efforts were made to minimize animal suffering and reduce  
201 the number of animals used. VTA slices were prepared according to procedures  
202 described previously (Hopf et al., 2007). The brain was removed rapidly from the skull  
203 and placed in modified ACSF containing 75 mM sucrose, 88 mM NaCl, 2.5 mM KCl,  
204 1.25 mM NaH<sub>2</sub>PO<sub>4</sub>, 7 mM MgCl<sub>2</sub>, 0.5 mM CaCl<sub>2</sub>, 25 mM NaHCO<sub>3</sub>, and saturated with  
205 95% O<sub>2</sub> and 5% CO<sub>2</sub> at ~0°C. Horizontal 250 µm midbrain slices containing VTA were  
206 cut on a vibratome (VT-1200, Leica, Wetzlar, Germany) and transferred to normal  
207 ACSF containing 126 mM NaCl, 2.5 mM KCl, 1.25 mM NaH<sub>2</sub>PO<sub>4</sub>, 2 mM MgSO<sub>4</sub>, 2.5  
208 mM CaCl<sub>2</sub>, 25 mM NaHCO<sub>3</sub>, and 10 mM glucose at 32°C. Slices were incubated for at  
209 least 60 min before patch-clamp recording.

210

### 211 **In vitro Optogenetics approach for electrophysiology**

212 The medial terminal nucleus of the accessory optic tract (MT) was used as the  
213 anatomical structure to define the VTA (Hopf et al., 2007). VTA neurons were  
214 visualized on an upright microscope (BX50WI, Olympus, Tokyo, Japan) using infrared  
215 differential interference contrast or fluorescent optics. Whole cell current and  
216 voltage-clamp recordings were made using an EPC10 amplifier and PatchMaster 2.54  
217 software (HEKA, Lambrecht, Germany). Electrodes had a resistance of 3–4 MΩ when

218 filled with the patch pipette solution. The internal pipette solution contained 130 mM  
219 K-gluconate, 8 mM NaCl, 0.1 mM CaCl<sub>2</sub>, 0.6 mM EGTA, 2 mM Mg-ATP, 0.1 mM  
220 Na<sub>3</sub>-GTP, and 10 mM HEPES (pH 7.4). Cells were held at -70 mV under a  
221 voltage-clamp mode to record evoked EPSC. To observe PPR, two synaptic  
222 responses were evoked by flashing 470 nm light (5 ms pulses, 0.1 Hz), which  
223 delivered via an optical fiber (core diameter 200 μm, N.A. = 0.39, ThorLabs) coupled  
224 to a LED light source (Mightex) 500 μm above the recording cell. The series  
225 resistance (Rs) was monitored by measuring the instantaneous current in response to  
226 a 5 mV voltage step command. Rs compensation was not used, but cells where Rs  
227 changed by > 15% were discarded.

228

### 229 **Identification of VTA-DA neurons**

230 After forming whole-cell recording mode, we identified DA neurons based on  
231 electrophysiological characteristics, which included both a spontaneous  
232 pacemaker-like firing and expression of a hyperpolarization-induced current (I<sub>h</sub>) in the  
233 voltage-clamp configuration, by 1 s hyperpolarizing voltage steps (-70 mV to -150  
234 mV) (Grace and Onn, 1989, Margolis et al., 2006, Zhang et al., 2010, Chieng et al.,  
235 2011).

236

### 237 **Locomotor behavior**

238 The locomotor activity test was conducted as described previously with some  
239 modifications (Borgland et al., 2006). The locomotor activity of animals was monitored

240 with a near infrared video camera within the operant chambers (Med Associates, St.  
241 Albans, USA). Distance traveled was measured using Open Field Activity Software  
242 (Med Associates) and analyzed locomotion estimates based on movement over a  
243 given distance and resting delays (movement in a given period of time). All animals  
244 were habituated to the test room for 2 h prior to the start of the experiment. Mice were  
245 habituated to the operant chambers for 5 min after 15 min intraperitoneal injection.  
246 After 15 minutes drug administration, the mice were placed in the chambers for the 5  
247 min testing session. On days 1, 2, and 3, all mice were only given saline  
248 (intraperitoneal injections) to habituate them to the test protocol. On day 4, mice were  
249 given drugs according to experimental group. After the behavioral tests, all mice were  
250 anesthetized with an overdose of chloral hydrate and perfused with 0.9% saline. The  
251 brain was removed and fixed in 4% paraformaldehyde for 24 hr. Coronal sections (80  
252  $\mu\text{m}$ ) were cut by a vibratome and fluorescence was observed under a microscope.  
253 Animals where the injection site was outside the VTA were discarded.

254

## 255 **Drug**

256 K-gluconate, ATP·K<sub>2</sub>, GTP·Na<sub>3</sub>, 4-(2-hydroxyethyl) piperazine-1-ethanesulfonic acid  
257 (HEPES), ethyleneglycol-bis(b-aminoethyl ether) N,N,N',N'- tetraacetic acid (EGTA),  
258 Triton X-100 and 0.01 M PBS were purchased from Sigma. Morphine was from  
259 Shenyang No.1 Pharmaceutical Factory, China. Clozapine-N-Oxide (CNO) was from  
260 Yihui Biological Technology Co, Shanghai, China. CNO was dissolved in 0.9% saline  
261 and administered at 10 mg/kg 30 min before the test (Ray et al., 2011, Li et al., 2013,

262 Ray et al., 2013, Mahler et al., 2014).

263

#### 264 **Data analysis**

265 Numerical data were expressed as mean  $\pm$  SE. Off-line data analysis was performed  
266 using a Mini Analysis Program (Synaptosoft), Clampfit (Axon Instruments), SigmaPlot  
267 (Jandel Scientific) and Origin (Microcal Software). Statistical significance was  
268 determined using Student's t-test for comparisons between two groups or ANOVA  
269 followed by Student-Newman-Keuls test for comparisons among three or more  
270 groups, n refers to the number of cells. Every cell was from different slice and a group  
271 of cells in each experiment was from at least 5 animals. All post hoc comparisons  
272 were made using Tukey's test. Results with  $P < 0.05$  were accepted as being  
273 statistically significant.

274

#### 275 **Acknowledgements**

276 This work was supported by the National Program of Basic Research sponsored by  
277 the Ministry of Science and Technology of China (2009CB52201 and 2013CB835100),  
278 Science and Technology Program of Yunnan Province (2013GA003) and Project of  
279 Foundation of National Natural Science of China (31121061, 91332204, 81371466  
280 and 31070932).p

281

#### 282 **Competing interest:**

283 All authors declare no conflict of interest.

284

## 285 **References**

- 286 Armbruster BN, Li X, Pausch MH, Herlitze S, Roth BL (2007) Evolving the lock to fit the key to create a  
287 family of G protein-coupled receptors potentially activated by an inert ligand. *Proceedings of*  
288 *the National Academy of Sciences of the United States of America* 104:5163-5168.
- 289 Borgland SL, Taha SA, Sarti F, Fields HL, Bonci A (2006) Orexin A in the VTA is critical for the induction  
290 of synaptic plasticity and behavioral sensitization to cocaine. *Neuron* 49:589-601.
- 291 Chen M, Zhao Y, Yang H, Luan W, Song J, Cui D, Dong Y, Lai B, Ma L, Zheng P (2015) Morphine  
292 disinhibits glutamatergic input to VTA dopamine neurons and promotes dopamine neuron  
293 excitation. *eLife* 4.
- 294 Chieng B, Azriel Y, Mohammadi S, Christie MJ (2011) Distinct cellular properties of identified  
295 dopaminergic and GABAergic neurons in the mouse ventral tegmental area. *The Journal of*  
296 *physiology* 589:3775-3787.
- 297 Gardner EL (2011) Addiction and brain reward and antireward pathways. *Advances in psychosomatic*  
298 *medicine* 30:22-60.
- 299 Grace AA, Onn SP (1989) Morphology and electrophysiological properties of immunocytochemically  
300 identified rat dopamine neurons recorded in vitro. *The Journal of neuroscience : the official*  
301 *journal of the Society for Neuroscience* 9:3463-3481.
- 302 Hopf FW, Martin M, Chen BT, Bowers MS, Mohamedi MM, Bonci A (2007) Withdrawal from  
303 intermittent ethanol exposure increases probability of burst firing in VTA neurons in vitro.  
304 *Journal of neurophysiology* 98:2297-2310.
- 305 Jalabert M, Bourdy R, Courtin J, Veinante P, Manzoni OJ, Barrot M, Georges F (2011) Neuronal circuits  
306 underlying acute morphine action on dopamine neurons. *Proceedings of the National*  
307 *Academy of Sciences of the United States of America* 108:16446-16450.
- 308 Johnson SW, North RA (1992) Opioids excite dopamine neurons by hyperpolarization of local  
309 interneurons. *The Journal of neuroscience : the official journal of the Society for*  
310 *Neuroscience* 12:483-488.
- 311 Kalivas PW (1993) Neurotransmitter regulation of dopamine neurons in the ventral tegmental area.  
312 *Brain research Brain research reviews* 18:75-113.
- 313 Li H, Penzo MA, Taniguchi H, Kopec CD, Huang ZJ, Li B (2013) Experience-dependent modification of a  
314 central amygdala fear circuit. *Nature neuroscience* 16:332-339.
- 315 Liu C, Fang X, Wu Q, Jin G, Zhen X (2015) Prefrontal cortex gates acute morphine action on dopamine  
316 neurons in the ventral tegmental area. *Neuropharmacology* 95:299-308.
- 317 Luscher C, Malenka RC (2011) Drug-evoked synaptic plasticity in addiction: from molecular changes to  
318 circuit remodeling. *Neuron* 69:650-663.
- 319 Mahler SV, Vazey EM, Beckley JT, Keistler CR, McGlinchey EM, Kauffling J, Wilson SP, Deisseroth K,  
320 Woodward JJ, Aston-Jones G (2014) Designer receptors show role for ventral pallidum input  
321 to ventral tegmental area in cocaine seeking. *Nature neuroscience* 17:577-585.
- 322 Margolis EB, Lock H, Hjelmstad GO, Fields HL (2006) The ventral tegmental area revisited: is there an  
323 electrophysiological marker for dopaminergic neurons? *The Journal of physiology*  
324 577:907-924.
- 325 Pascoli V, Turiault M, Luscher C (2011) Reversal of cocaine-evoked synaptic potentiation resets

326 drug-induced adaptive behaviour. *Nature* 481:71-75.  
327 Penzo MA, Robert V, Tucciarone J, De Bundel D, Wang M, Van Aelst L, Darvas M, Parada LF, Palmiter RD,  
328 He M, Huang ZJ, Li B (2015) The paraventricular thalamus controls a central amygdala fear  
329 circuit. *Nature* 519:455-459.  
330 Ray RS, Corcoran AE, Brust RD, Kim JC, Richerson GB, Nattie E, Dymecki SM (2011) Impaired  
331 respiratory and body temperature control upon acute serotonergic neuron inhibition. *Science*  
332 333:637-642.  
333 Ray RS, Corcoran AE, Brust RD, Soriano LP, Nattie EE, Dymecki SM (2013) Egr2-neurons control the  
334 adult respiratory response to hypercapnia. *Brain research* 1511:115-125.  
335 Stuber GD, Britt JP, Bonci A (2012) Optogenetic modulation of neural circuits that underlie reward  
336 seeking. *Biological psychiatry* 71:1061-1067.  
337 White FJ (1996) Synaptic regulation of mesocorticolimbic dopamine neurons. *Annual review of*  
338 *neuroscience* 19:405-436.  
339 Wise RA (1989) Opiate reward: sites and substrates. *Neuroscience and biobehavioral reviews*  
340 13:129-133.  
341 Zhang TA, Placzek AN, Dani JA (2010) In vitro identification and electrophysiological characterization of  
342 dopamine neurons in the ventral tegmental area. *Neuropharmacology* 59:431-436.  
343 Zucker RS, Regehr WG (2002) Short-term synaptic plasticity. *Annual review of physiology* 64:355-405.

344

## 345 **Legends**

346 **Figure 1.** Effect of morphine on paired-pulse ratio (PPR) of light-evoked EPSC in DA  
347 neurons of the VTA from the mPFC. (a) Left panel: image of coronal brain slice  
348 showing expression of Chr2-mCherry (red color) in the mPFC at 6 weeks after the  
349 injection of the virus into the mPFC. Right panel: image of coronal brain slice showing  
350 expression of Chr2-mCherry in the VTA at 6 weeks after the injection of the virus into  
351 the mPFC. (b) Left panel: typical original traces of the first and second EPSCs evoked  
352 by a pair of blue light pulses (470 nm, intervals of 50 ms at 0.1 Hz) before and after  
353 morphine (10  $\mu$ M) as well as superimposed traces of the first and second EPSCs  
354 normalized to the amplitude of the first EPSC in DA neurons of the VTA. Right panel:  
355 average PPR evoked by a pair of blue light pulses (470 nm, intervals of 50 ms at 0.1  
356 Hz) before and after morphine (10  $\mu$ M) in VTA DA neurons from the mPFC (n = 7 cells

357 from five mice,  $P < 0.05$ , compared to control before morphine).

358

359 **Figure 2.** Effect of morphine on paired-pulse ratio (PPR) of light-evoked EPSC in DA  
360 neurons of the VTA from the BLA. (a) Left panel: image of coronal brain slice showing  
361 expression of ChR2-mCherry (red color) in the BLA at 6 weeks after the injection of  
362 the virus into the BLA. Right panel: Image of coronal brain slice showing expression of  
363 ChR2-mCherry in the VTA at 6 weeks after the injection of the virus into the BLA. (b)  
364 Left panel: typical original traces of the first and second EPSCs evoked by a pair of  
365 blue light pulses (470 nm, intervals of 50 ms at 0.1 Hz) before and after morphine (10  
366  $\mu\text{M}$ ) as well as superimposed traces of the first and second EPSCs normalized to the  
367 amplitude of the first EPSC in DA neurons of the VTA. Right panel: average PPR  
368 evoked by a pair of blue light pulses (470 nm, intervals of 50 ms at 0.1 Hz) before and  
369 after morphine (10  $\mu\text{M}$ ) in VTA DA neurons from the BLA ( $n = 11$  cells from eight mice,  
370  $P > 0.05$ , compared to control before morphine).

371

372 **Figure 3.** Effect of morphine on paired-pulse ratio (PPR) of light-evoked EPSC in DA  
373 neurons of the VTA from the LH. (a) Left panel: image of coronal brain slice showing  
374 expression of ChR2-mCherry (red color) in the LH at 6 weeks after the injection of the  
375 virus into the LH. Right panel: image of coronal brain slice showing expression of  
376 ChR2-mCherry in the VTA at 6 weeks after the injection of the virus into the LH (b) Left  
377 panel: typical original traces of the first and second EPSCs evoked by a pair of blue  
378 light pulses (470 nm, intervals of 50 ms at 0.1 Hz) before and after morphine (10  $\mu\text{M}$ )



379 as well as superimposed traces of the first and second EPSCs normalized to the  
380 amplitude of the first EPSC in DA neurons of the VTA. Right panel: average PPR  
381 evoked by a pair of blue light pulses (470 nm, intervals of 50 ms at 0.1 Hz) before and  
382 after morphine (10  $\mu$ M) in VTA DA neurons from the LH (n = 7 cells from five mice, P >  
383 0.05, compared to control before morphine).

384

385 **Figure 4.** Influence of the inhibition of glutamatergic projection neurons from the  
386 mPFC to the VTA using chemogenetic method on morphine-induced increase in  
387 locomotor activity of mice. (a) Left panel: image of coronal brain slice showing  
388 AAV-hSyn-DIO-hM4D(Gi)-mCherry in the mPFC. Right panel: images of coronal brain  
389 slice showing CAV-GFP-cre in the VTA. (b) Left panel: average distance traveled by  
390 mice in morphine+hM4D(Gi)+saline (i.p, 0.2 ml/mice) group (n = 12, \*P < 0.001,  
391 compared with control before morphine) and in morphine+hM4D(Gi)+CNO (i.p, 0.2  
392 ml/mice group (n = 11, \*P < 0.001, compared with control before morphine, #P =  
393 0.0016, compared with morphine+hM4D(Gi)+saline) during 5 min before and at 15  
394 min after morphine (i.p, 10mg/kg). Right panel: average change percentage of  
395 distance traveled by mice in morphine+hM4D(Gi)+saline group (n = 12) and in  
396 morphine+hM4D(Gi)+CNO group (n = 11, P = 0.0313, compared with  
397 morphine+hM4D(Gi)+saline). Data are shown as the mean  $\pm$  s.e.m.

Figure 1

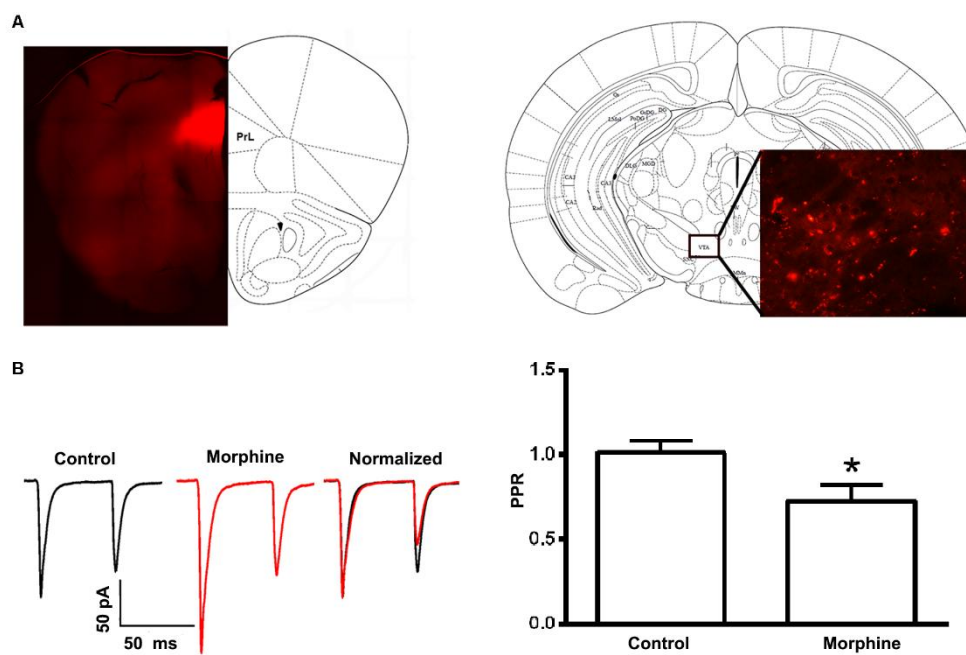

Figure 2

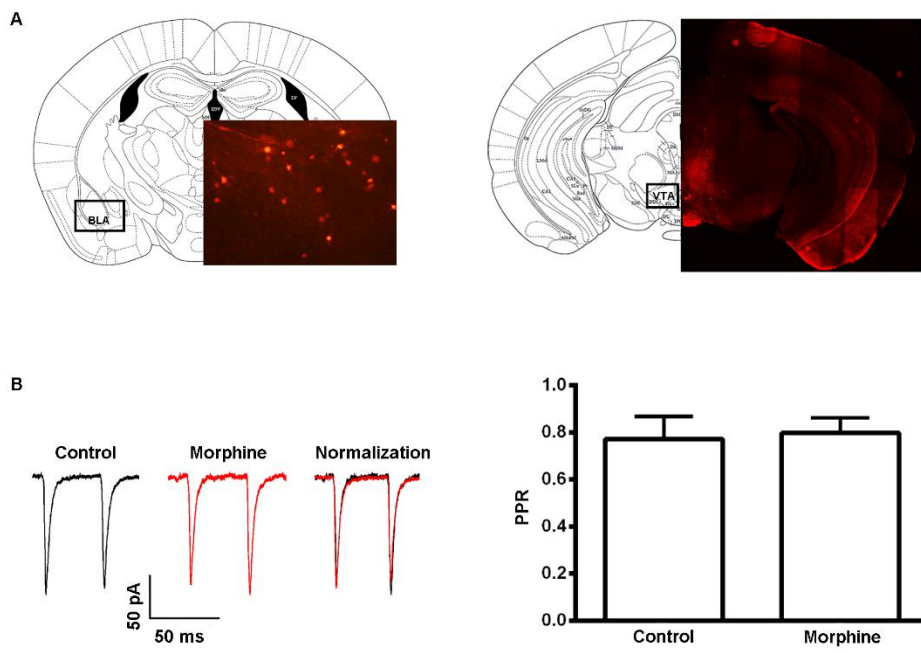

Figure 3

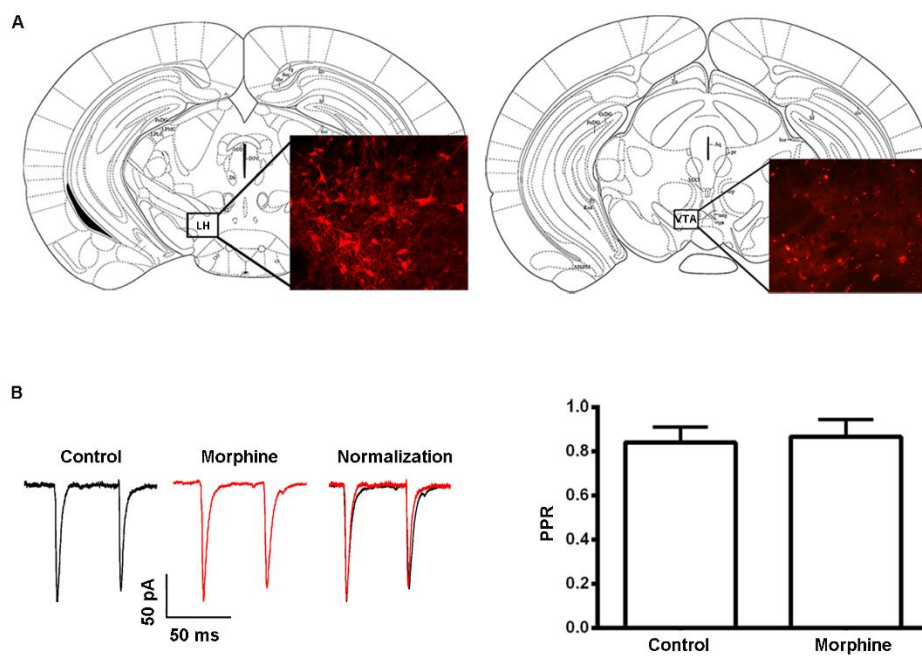

Figure 4

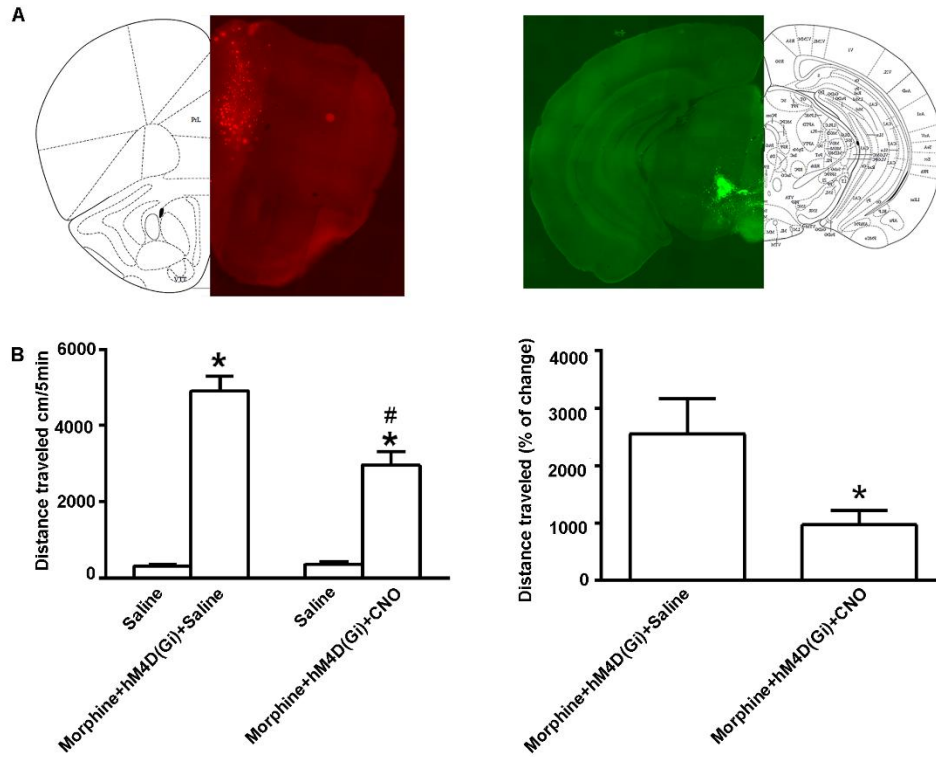

Source: https://www.biorxiv.org/content/10.1101/133090v1.full.pdf
